# Supplementary material
Source: PubMed Central journal article supplement (PMC4330467)
Supplement: NIHMS657204-supplement-Supp_Table_1.pdf [file NIHMS657204-supplement-Supp_Table_1.pdf]

**Supplementary Table S1. Primers used for Q-PCR**

| <i>Gene</i>  | <i>forward</i>               | <i>Reverse</i>                 |
|--------------|------------------------------|--------------------------------|
| <i>Myog</i>  | 5'GGTGCCCAGTGAATGCAACT 3'    | 5' GCTGTCCACGATGGACGTAA 3'     |
| <i>Myod1</i> | 5'CTCAAACCCCAATGCGATTT 3'    | 5' CTGGAAGAACGGCTTCGAAA 3'     |
| <i>Myf5</i>  | 5'TGCAAGAGGAAGTCCACTACCA 3'  | 5' CTCTTGAGCGTCTCGAAAGCTT 3'   |
| <i>Myh1</i>  | 5'GAGGGACAGTTCATCGATAGCAA3'  | 5'GGGCCAACTTGTCATCTCTCAT 3'    |
| <i>Myh 2</i> | 5'ATCGCAGAGTCCCAGGTCAA 3'    | 5'AGAATCACACAGGCGCATGA 3'      |
| <i>Myh 3</i> | 5'CTTCACCTCTAGCCGGATGGT 3'   | 5'AATTGTCAGGAGCCACGAAAAT3'     |
| <i>Myh 4</i> | 5'CACCTGGACGATGCTCTCAGA 3'   | 5'GCTCTTGCTCGGCCACTCT 3'       |
| <i>Myh 6</i> | 5'CCAACACCAACCTGTCCAAGT 3'   | 5' AGAGGTTATTCCTCGTCGTGCAT 3'  |
| <i>Myh 7</i> | 5'CTCAAGCTGCTCAGCAATCTATTT3' | 5' GGAGCGCAAGTTTGTATAAGT 3'    |
| <i>Myh 8</i> | 5'CAGGAGCAGGAATGATGCTCTGAG3' | 5'AGTTCCTCAAACCTTTCAGCAGCCAA3' |
| <i>Myh13</i> | 5' GCCCCTCTACCCACTTCTACT 3'  | 5' TGAACCTCCCTGTCCAACAA 3'     |
| <i>GAPDH</i> | 5' GTATGACTCCACTCACGGCAA 3'  | 5' GGTCTCGCTCCTGGAAGATG 3'     |
